# Supplementary material for: Mechanotransduction in talin through the interaction of the R8 domain with DLC1
Source: PLOS journal article supplement (doi:10.1371/journal.pbio.2005599), 2018-07-20

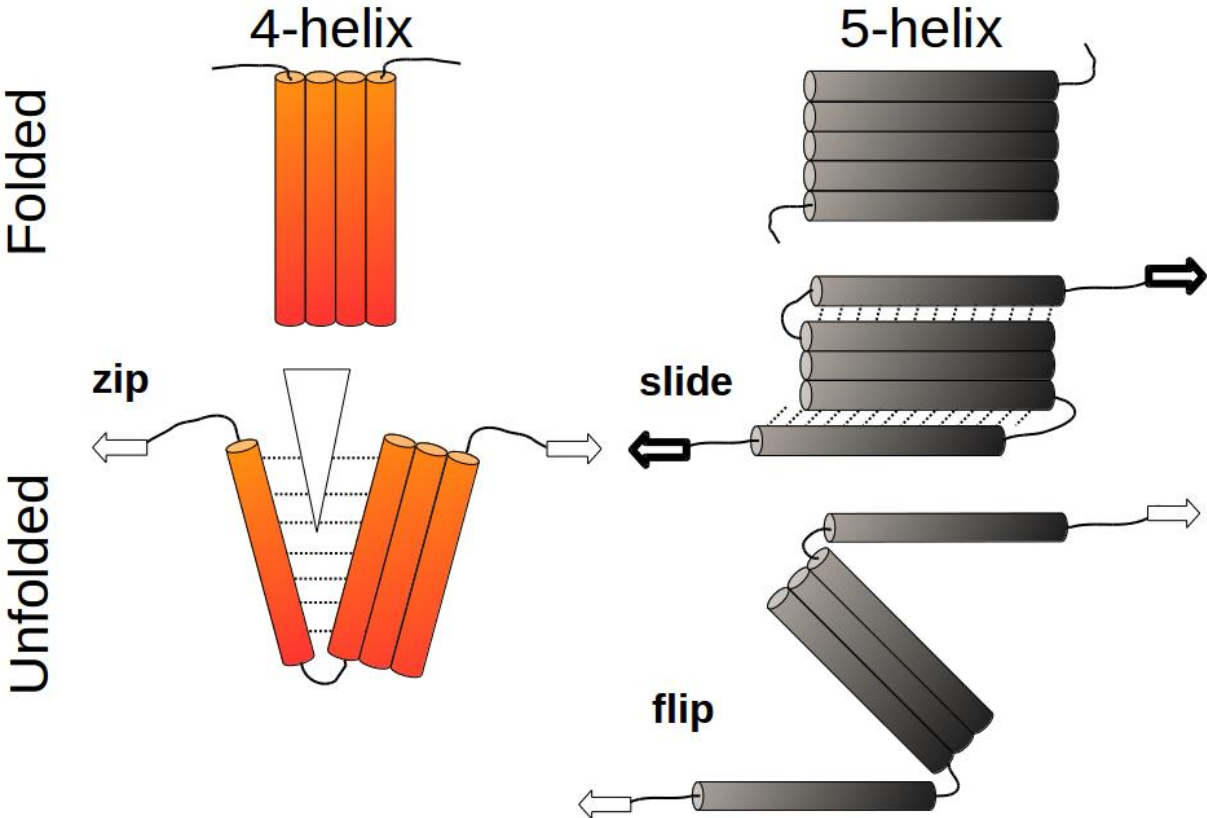

Supplement: S2 (10.1371/journal.pbio.2005599.s002) [file journal.pbio.2005599.s002]
